# Supplementary material for: Physicians’ perceptions of the use of conversational agents in everyday care: a qualitative study
Source: Research Square preprint supplement (doi:10.21203/rs.3.rs-7189445/v1), 2025-08-13
Supplement: Supplementary file 3 [file d95ef5b5cc4f24cfa4afa382.pdf]

#### Additional file 4: Original quotes in German and the English translation

| Interview partner (IP) | Original quote (German)                                                                                                                                                                                                                                                                                                                                                                                                                             | English translation                                                                                                                                                                                                                                                                                                                                                                                         |
|------------------------|-----------------------------------------------------------------------------------------------------------------------------------------------------------------------------------------------------------------------------------------------------------------------------------------------------------------------------------------------------------------------------------------------------------------------------------------------------|-------------------------------------------------------------------------------------------------------------------------------------------------------------------------------------------------------------------------------------------------------------------------------------------------------------------------------------------------------------------------------------------------------------|
| IP-8                   | „Das Gesundheitswesen ist ein budgetiertes System und für Innovationen fehlt uns ganz klar das Budget. Aber natürlich hat es auch mit Menschen zu tun. Und mit den Bedingungen wie Regulationen, Datenschutz und Ängsten, dass man was falsch machen könnte. [...] Das hat auch weitere verschiedene Gründe, vor allen Dingen auch die, dass wir chronisch unterbesetzt sind und keine Zeit habe neue Technologien auszuprobieren und einzuführen.“ | “Healthcare is a budget-driven system, and we clearly lack the budget for innovations. But of course, it also has to do with people. And with conditions such as regulations, data protection and fears that you might do something wrong. [...] There are also various other reasons, above all the fact that we are chronically understaffed and have no time to try out and implement new technologies.” |
| IP-9                   | „Ich glaube, das ist einfach noch zu zukunftsorientiert. So modern sind die Krankenhäuser größtenteils noch nicht. Wenn sie noch nicht mal digital sind, dann glaube ich, kann man CAs und AI noch nicht integrieren.“                                                                                                                                                                                                                              | “I think it's just too future-oriented. Most hospitals are not that modern yet. If they're not even digital, then I don't think you can integrate CAs and AI yet.”                                                                                                                                                                                                                                          |
| IP-8                   | „Also die größte Herausforderung ist, glaube ich die Interoperabilität und Schnittstellen-Thematik.“                                                                                                                                                                                                                                                                                                                                                | “I think the biggest challenge is the interoperability and interface issue.”                                                                                                                                                                                                                                                                                                                                |
| IP-10                  | „Die Verknüpfung mit den bestehenden Systemen. Der CA muss auf verschiedene Systeme anpassbar sein und sich einfach in die bestehenden Systeme einfügen. Die Krux hierbei liegt aber auch daran, dass fast jede Praxis und Klinik eine eigene Software hat. Ein CA muss dann also mit all diesen System kompatibel sein.“                                                                                                                           | “The integration into existing systems. The CA must be adaptable to different systems and easy to integrate into existing systems. The problem here is that almost every practice and clinic has its own software. A CA must therefore be compatible with all these systems.”                                                                                                                               |
| IP-5                   | „CAs werden zukünftig eine immer größere Rolle im Gesundheitswesen spielen und fester Bestandteil der Gesundheitsversorgung sein, weil wir Ärzte immer mehr Patienten versorgen müssen und dann werden wir die Unterstützung solcher Chatbots benötigen.“                                                                                                                                                                                           | “CAs will play an increasingly important role in healthcare in the future and will be an integral part of healthcare provision, because we physicians will have to care for more and more patients, and then we will need the support of such chatbots.”                                                                                                                                                    |
| IP-10                  | „Durch fehlendes Personal sind wir jetzt schon vollkommen unterbesetzt und das wird in Zukunft auch nicht besser. Wir brauchen daher solche Systeme [...]“                                                                                                                                                                                                                                                                                          | “We are already completely understaffed due to a lack of personnel, and this will not get any better in the future. We therefore need such systems [...]”                                                                                                                                                                                                                                                   |

|       |                                                                                                                                                                                                                                                                                                                                                                                       |                                                                                                                                                                                                                                                                                                                                             |
|-------|---------------------------------------------------------------------------------------------------------------------------------------------------------------------------------------------------------------------------------------------------------------------------------------------------------------------------------------------------------------------------------------|---------------------------------------------------------------------------------------------------------------------------------------------------------------------------------------------------------------------------------------------------------------------------------------------------------------------------------------------|
| IP-5  | „Die gesamte Versorgung und unsere tagtägliche Arbeit wird sich durch den Einsatz von Technologie verändern. Damit wir mit den Systemen auch umgehen können und verstehen wie sie funktionieren brauchen wir auch eine IT-lastigere Ausbildung bei medizinischen Berufen.“                                                                                                            | “The entire healthcare system and our day-to-day work will change through the use of technology. In order for us to be able to handle the systems and understand how they work, we also need more IT-oriented training for medical professions.”                                                                                            |
| IP-5  | „Also wir werden ja immer mehr unsere Patienten auch im häuslichen Bereich behandeln, da es immer mehr ältere Patienten geben und zu immer mehr unversorgten Gebieten kommen wird. Das heißt die Patienten sind zu Hause und sollen überwacht werden. Dies kann auch durch eine Technologie wie CAs erfolgen, die die Informationen gesammelt und strukturiert an mich weiterleitet.“ | “We will be treating more and more of our patients at home, as there will be more and more elderly patients and more and more untreated areas. This means that patients are at home and should be monitored. This can also be done using technology such as CAs, which collects the information and forwards it to me in a structured way.” |
| IP-1  | “[...] das medizinische Wissen wird seit Jahren immer mehr, sodass es kaum noch möglich ist, dass ein Arzt alles weiß. Wir brauchen daher eine Unterstützung und bei solchen Systemen muss man sagen, die können unendliches Wissen erreichen und durch den Einsatz von solchen CAs wäre halt das komplette medizinische Wissen für uns Ärzte abrufbar.“                              | “[...] medical knowledge has been increasing for years, so it is hardly possible for a physician to know everything. We therefore need support, and with systems like this you have to say that they can achieve infinite knowledge, and by using such CAs, we physicians would be able to access all medical knowledge.”                   |
| IP-4  | „Nachdem CAs anhand von Fakten arbeiten, gehe ich davon aus, dass sie teilweise auch besser sein können als jeder Arzt, weil der Computer kann sich halt perfektionieren.“                                                                                                                                                                                                            | “As CAs work on the basis of facts, I assume that they can sometimes be better than any physician, because the computer can perfect itself.”                                                                                                                                                                                                |
| IP-3  | „Die neue Generation ist ja eher bemüht bevor und nach dem Arzt das Internet zu befragen. [...]. Wäre nicht schlecht, wenn sie sich selbst informieren können und wenn das mal seriöse Quellen wären.“                                                                                                                                                                                | “The new generation tends to consult the Internet before and after a visit to the physician. [...]. It wouldn't be a bad thing if they could inform themselves and if the sources were reputable.”                                                                                                                                          |
| IP-12 | „[...] eine 24/7 Erreichbarkeit, dazu eine personalisierte Kommunikation und individualisierte Behandlung [...].“                                                                                                                                                                                                                                                                     | “[...] 24/7 availability, personalized communication and individualized treatment [...].“                                                                                                                                                                                                                                                   |
| IP-7  | „immer einfachere Terminvereinbarung wünschen, keine Vor-Ort Besuche mehr, sondern die Patienten wollen sich heute selbst informieren und                                                                                                                                                                                                                                             | “[...] increasingly easy appointment scheduling, no more on-site visits, but patients today want to inform themselves and, preferably,                                                                                                                                                                                                      |

|       |                                                                                                                                                                                                                                                                                                                                                 |                                                                                                                                                                                                                                                                                                                               |
|-------|-------------------------------------------------------------------------------------------------------------------------------------------------------------------------------------------------------------------------------------------------------------------------------------------------------------------------------------------------|-------------------------------------------------------------------------------------------------------------------------------------------------------------------------------------------------------------------------------------------------------------------------------------------------------------------------------|
|       | bestenfalls selbst diagnostizieren. [...] Und genau bei diesen Aspekten können CAs enorm unterstützen.“                                                                                                                                                                                                                                         | diagnose themselves. [...] And it is precisely in these aspects that CAs can provide enormous support.”                                                                                                                                                                                                                       |
| IP-3  | „CAs sind das perfekte Tool für den modernen Patienten.“                                                                                                                                                                                                                                                                                        | “CAs are the perfect tool for the modern patient”                                                                                                                                                                                                                                                                             |
| IP-3  | „[...] dadurch hat man in kurzer Zeit und 24/7 also praktisch immer Zugriff auf Gesundheitsinformationen. [...] Das kommt vor allem den Menschen zu Gute, die es nicht regelmäßig zum Arzt schaffen aus welchen Gründen auch immer.“                                                                                                            | “[...] this means that you have access to health information in the shortest possible time and practically 24/7. [...] This is particularly beneficial for people who, for whatever reason, are unable to see a physician regularly.”                                                                                         |
| IP-10 | „[...] ein Tool zur Terminvereinbarung und -erinnerung sowie zur personalisierten Beantwortung von Patientenfragen 24/7 am Tag.“                                                                                                                                                                                                                | “[...] a tool for making and reminding one of appointments and for personalized responses to patient inquiries 24/7”                                                                                                                                                                                                          |
| IP-3  | „Conversational Agents bringen einen enormen Qualitätszuwachs, daher freue mich auf deren Einsatz.“                                                                                                                                                                                                                                             | “Conversational agents bring an enormous increase in quality. This is why I'm looking forward to using them.”                                                                                                                                                                                                                 |
| IP-2  | „CAs können die Effizienz von Behandlung und Diagnostik erheblich steigern, da die CA auch nicht offensichtliche und seltene Krankheiten berücksichtigen, Anamnese, Laborwerte und Vorgeschichte des Patienten in kurzer Zeit zusammenfassen, Medikamentenunverträglichkeiten erkennen und Vergleichsfälle mit ähnlichem Verlauf abrufen kann.“ | “CAs can significantly increase the efficiency of treatment and diagnostics, as the CA can also take into account non-obvious and rare diseases, summarize the patient's medical history, laboratory values and past history in a short time, identify drug intolerances and call up comparative cases with a similar course” |
| IP-16 | „Solange CAs ein extra System sind, glaube ich, haben wir keinen Qualitätsverlust. Sobald sie aber das medizinische Personal ersetzen, wird es automatisch zu einem Qualitätsverlust führen.“                                                                                                                                                   | “As long as CAs are an extra system, I don't think we will have a loss of quality. But as soon as they replace the medical staff, it will automatically lead to a loss of quality.”                                                                                                                                           |
| IP-4  | „[...] ein großes Risiko ist, dass man sich einfach zu sehr auf den CA verlässt und man verlernt, selber zu denken. Und dann ist Systemausfall und nichts funktioniert mehr und ohne CA kann man es auch nicht mehr.“                                                                                                                           | “[...] a major risk is that you simply rely too much on the CA and you forget to think for yourself. And then the system fails and nothing works anymore and you can't do it without the CA.”                                                                                                                                 |
| IP-2  | „Ich habe Angst vor einem Qualitätsverlust im Sinne von Überdiagnostik. [...] Wenn man jedem Vorschlag des Systems nachgeht auch wenn es noch so                                                                                                                                                                                                | “I am afraid of a loss of quality in the sense of overdiagnosis. [...] If every suggestion from the system is followed up, no matter how minimal, then we                                                                                                                                                                     |

|       |                                                                                                                                                                                                                                                                                      |                                                                                                                                                                                                                                                          |
|-------|--------------------------------------------------------------------------------------------------------------------------------------------------------------------------------------------------------------------------------------------------------------------------------------|----------------------------------------------------------------------------------------------------------------------------------------------------------------------------------------------------------------------------------------------------------|
|       | minimal ist dann ist uns Ärzten nicht geholfen. Dann dauert die Diagnostik ewig und die Kosten schießen in die Höhe.“                                                                                                                                                                | physicians won't be helped. Diagnostics will take forever, and costs will explode.”                                                                                                                                                                      |
| IP-16 | „[Ein] Risiko ist möglicherweise auch, dass sozusagen zu viele Kranke geschaffen werden durch solche Systeme.“                                                                                                                                                                       | “[One] risk could also be that such systems result in too many sick people.“                                                                                                                                                                             |
| IP-11 | „Problematisch ist auch eine falsche Erwartungshaltung seitens der Patienten im Sinne von aber der Chatbot hat gesagt, dass ist die und die Krankheit und die sollte so behandelt werden. Bei der Untersuchung stellt sich das aber dann ein bisschen anders dar [...].“             | “Another problem is that patients have false expectations in the sense that the chatbot has said, ‘This is the disease, and this is how it should be treated.’ During the examination, however, things look a little different [...]”.                   |
| IP-5  | „[...] was passieren kann ist, dass sich der ein oder andere nur noch von einem CA behandeln lässt und keinen Arzt mehr aufsucht.“                                                                                                                                                   | “[...] what can happen is that some people only seek treatment from a CA and no longer consult a physician.”                                                                                                                                             |
| IP-8  | „Das Gesundheitswesen steht ja bekanntermaßen vor einer Vielzahl von Herausforderungen wie Fachkräftemangel, Überlastung von medizinischem Personal, steigende Kosten und viele viele mehr.“                                                                                         | “As we all know, the healthcare sector is facing a number of challenges, such as a shortage of specialists, overworked medical staff, rising costs and many more.”                                                                                       |
| IP-16 | „Unterstützung erhoffe ich mir vor allem in der Dokumentation. Ich habe das Gefühl, wenn ich nicht so viel dokumentieren müsste, wie ich es tue, dann würde ich dreimal so viele Patienten behandeln können.“                                                                        | “I'm hoping for the greatest support with documentation. I have the feeling that I could treat three times as many patients if I didn't have to document as much as I do.”                                                                               |
| IP-2  | „Wünschenswert wäre es, wenn der CA bereits während des Patientengesprächs mit dokumentiert und bereits den Arztbrief erstellt, welchen ich danach nur kurz kontrollieren muss. [...] Er könnte auch gleich die Rechnung schreiben, wenn er die erbrachten Leistungen dokumentiert.“ | “It would be desirable for the CA to document during the patient consultation and write the physician's letter, which I only have to check briefly afterwards. [...] The CA could also write the invoice as soon as it documents the services provided.” |
| IP-16 | „[...] durch den Einsatz wird natürlich Zeit frei, die ich dann intensiver für andere Patienten verwenden kann oder auch mehr Patienten am Tag behandeln.“                                                                                                                           | “[...] the assignment frees up time, which I can then use more intensively for other patients or treat more patients per day.”                                                                                                                           |
| IP-12 | „Durch die Einführung von CAs können meiner Meinung nach enorme Kosteneinsparungen erreicht werden [...].“                                                                                                                                                                           | “In my opinion, enormous cost savings can be achieved through the introduction of CAs [...]”                                                                                                                                                             |
| IP-14 | „Ich glaube durch CAs kommt es zu weniger realen Arztbesuchen,                                                                                                                                                                                                                       | “I believe that CAs lead to fewer real physician visits,                                                                                                                                                                                                 |

|       |                                                                                                                                                                                                                                                                                                                          |                                                                                                                                                                                                                                                                                    |
|-------|--------------------------------------------------------------------------------------------------------------------------------------------------------------------------------------------------------------------------------------------------------------------------------------------------------------------------|------------------------------------------------------------------------------------------------------------------------------------------------------------------------------------------------------------------------------------------------------------------------------------|
|       | die vielleicht auch unnötig sind, dadurch auch Kosten sparen und Kapazitäten für Patienten freigeben, die es wirklich brauchen.“                                                                                                                                                                                         | which may also be unnecessary, thereby also saving costs and freeing up capacity for patients who really need it.”                                                                                                                                                                 |
| IP-9  | „[...] man erhofft sich auch einen schnelleren Zugang zur Versorgung und auch den richtigen Zugang. Also, dass der Patient direkt vorgeschlagen bekommt, das sind die richtigen Fachkräfte für die Beschwerden und nicht, dass alle in die Notaufnahme gehen, sondern direkt in den richtigen Versorgungsbereich [...].“ | “[...] the hope is also faster access to care and the appropriate access. In other words, the patient is told directly that these are the right specialists for their complaints, and not everyone is sent to the emergency room, but sent directly to the right care area [...].” |
| IP-15 | „[...] Routine- und einfache Aufgaben können schon heute von CAs übernommen werden, um dem Fachkräftemangel entgegenzuwirken.“                                                                                                                                                                                           | “[...] routine and simple tasks will be performed by CAs in order to counteract the shortage of specialists.”                                                                                                                                                                      |
| IP-6  | „Ich glaube, CAs kann man praktisch überall in der Medizin einsetzen. Und weil sie so flexibel sind können sie auch die Probleme in jedem Bereich angehen und hoffentlich auch lösen.“                                                                                                                                   | “I think CAs can be used practically anywhere in medicine. And because they are so flexible, they can tackle and hopefully solve problems in any field.”                                                                                                                           |
| IP-3  | „Das Thema Datenschutz wird oft bei neuen Innovationen als Grund vorgeschoben, aber das lässt sich ehrlichweise alles lösen.“                                                                                                                                                                                            | “The issue of data protection is often put forward as a reason for new innovations, but it can honestly all be solved.”                                                                                                                                                            |
| IP-6  | „Es ist wichtig eine Risiko-Nutzen Abwägung zu machen, auch mal in Richtung des Nutzens. Daten nicht zu nutzen kostet auch Leben.“                                                                                                                                                                                       | “It is important to consider the risk-benefit ratio, and that should be sometimes be in favour of the benefit. Not using data also costs lives.”                                                                                                                                   |
| IP-6  | „Ich glaube da ist jetzt der Gesetzgeber stark gefragt, um Lösungen zu entwickeln und sich auch mal was zu trauen.“                                                                                                                                                                                                      | “I think it is now up to legislators to develop solutions and have the courage to do something.”                                                                                                                                                                                   |
| IP-5  | „[...] der CA ein dauerhaft funktionierendes System ist, was so gut wie keine technischen Ausfälle hat und immer seinen Nutzungszweck erfüllt. Sollte er das nicht tun und zu viele technische Ausfälle haben, würde ich den CA nicht nutzen und auch nicht meinen Patienten empfehlen.“                                 | “[...] the CA [as] a permanently functioning system that has practically no technical failures and always fulfils its purpose. If it doesn't and has too many technical failures, I wouldn't use the CA and wouldn't recommend it to my patients.”                                 |
| IP-6  | „Also entscheidend ist ja die Datenbank aus welcher der CA die Antworten zieht. Die muss natürlich medizinisch fundiert und immer auf dem aktuellsten Stand                                                                                                                                                              | “The decisive factor is the database from which the CA obtains the answers. Of course, it must be medically sound and always up-to-date.                                                                                                                                           |

|       |                                                                                                                                                                                                                                                                                           |                                                                                                                                                                                                                                                             |
|-------|-------------------------------------------------------------------------------------------------------------------------------------------------------------------------------------------------------------------------------------------------------------------------------------------|-------------------------------------------------------------------------------------------------------------------------------------------------------------------------------------------------------------------------------------------------------------|
|       | sein. [...] Das System sollte aber auch mit jeder Anfrage dazulernen und sich verbessern.“                                                                                                                                                                                                | [...] But the system should also learn and improve with every query.”                                                                                                                                                                                       |
| IP-10 | „Schön wäre es, wenn die Antwort immer nachvollziehbar sind und anhand eines Entscheidungsbaumes oder Kausalitätskette gegeben werden und die Ergebnisse mit einer Prozentangabe der Wahrscheinlichkeit versehen ist.“                                                                    | “It would be nice if the answers were always comprehensible and were given using a decision tree or a causal chain and if the results were given with a percentage probability.”                                                                            |
| IP-8  | „benutzerfreundlich und für jeden bedienbar“                                                                                                                                                                                                                                              | “user-friendly and operable by everyone”                                                                                                                                                                                                                    |
| IP-12 | „jeder hat einen anderen Geschmack, Vorlieben und Bedürfnisset.“                                                                                                                                                                                                                          | “everyone has different tastes, preferences and needs”                                                                                                                                                                                                      |
| IP-3  | „Ein Avatar ist bei den Patienten auf jeden Fall hilfreich und würde sie binden. Wir Ärzte brauchen einen Avatar nicht. Für uns ist entscheidend, dass das System einwandfrei funktioniert.“                                                                                              | “An avatar is definitely helpful for patients and would create loyalty. We physicians don't need an avatar. For us, it's crucial that the system works perfectly.”                                                                                          |
| IP-3  | „lebt nun mal von einer guten Arzt-Patienten Beziehungen. Es sollte daher auch zwischen dem CA und dem Patienten eine Art Verbindung geben wie mit dem Arzt.“                                                                                                                             | “is based on a good physician–patient relationship. There should therefore also be a kind of connection between the CA and the patient, as there is with the physician”                                                                                     |
| IP-6  | „zuverlässig sein, d.h. korrekte Diagnosen stellen, die bestmögliche Behandlung vorschlagen und seine Informationen aus einer glaubwürdigen und evidenzbasierten Quelle haben. Gleichzeitig will ich auch nicht immer alles hinterfragen müssen, sondern ein Sicherheitsgefühl bekommen.“ | “be reliable, i.e. make correct diagnoses, suggest the best possible treatment and have information from a credible and evidence-based source. At the same time, I don't always want to have to question everything; I want to have a sense of security”    |
| IP-4  | „Auch hier kommt es zu einer klassischen Kosten-Nutzen-Analyse. Die Kosten für Einführung und Nutzen dürfen aber nicht zu hoch sein, sonst wird es natürlich wegen unserem limitierten Budget nicht eingeführt.“                                                                          | “A classic cost–benefit analysis is also carried out here. However, the costs of introduction and benefits must not be too high, otherwise it will of course not be introduced due to our limited budget.”                                                  |
| IP-16 | „Die Vorbehalte sind ja schon da und das wird eine Altersfrage sein und wie jemand zu der Technologie steht. [...] eigentlich möchten gerade, habe ich das Gefühl ältere Patienten gern von einem Arzt gesehen und behandelt werden. Da wird es                                           | “The reservations are already there, and that is a question of age and attitude to technology. [...] I have the feeling that older patients would actually like to be seen and treated by a physician. I think they will find it difficult to accept a CA.” |

|  |                                                       |  |
|--|-------------------------------------------------------|--|
|  | glaube ich schwer, dass die einen<br>CA akzeptieren.“ |  |
|--|-------------------------------------------------------|--|
