# Supplementary material for: Physicians’ perceptions of the use of conversational agents in everyday care: a qualitative study
Source: Research Square preprint supplement (doi:10.21203/rs.3.rs-7189445/v1), 2025-08-13
Supplement: Supplementary file 4 [file f26dea495c2f30793cb0ae3c.pdf]

**Additional file 5: Risks mentioned by the physicians interviewed**

This table summarizes the potentials and risks of CAs. For a clearer presentation of the potentials and risks in the table, different shades of gray are used depending on the target group (Potentials and risks for physicians and patients are shaded in white, those that only affect physicians are shaded in light gray, and those that only affect patients are shaded in dark gray).

| Potentials                                | Risks                                                          |
|-------------------------------------------|----------------------------------------------------------------|
| Relief for the healthcare system          | More time-intensive treatments                                 |
| Relief for healthcare professionals       | Over-diagnostics                                               |
| Increased quality of care                 | Patient safety                                                 |
| Individualized treatment                  | Loss of quality with replacing use                             |
| Easier and faster access to care          | Unlearning the medical profession, too much reliance on the CA |
| Combating the shortage of skilled workers | Loss of confidence in one's own medical abilities              |
| Better supply in rural areas              | Legal issues (liability, responsibility for errors)            |
| Making work easier for physicians         | Data privacy                                                   |
| Sense of security for physicians          | Lack of adoption                                               |
| Broad knowledge among physicians          | Misdiagnoses                                                   |
| Cost savings                              | Increased costs                                                |
| Time saving                               |                                                                |
| Permanent availability                    |                                                                |
| Speeding up and simplifying processes     |                                                                |
| Non-judgmental property                   |                                                                |
| Fewer unnecessary visits to the physician |                                                                |
